# Supplementary material
Source: MDPI journal article supplement (https://www.mdpi.com/2227-7390/10/9/1543)
Supplement: s1 [file s1]

# Computer-Aided Methods for Molecular Classification

Alina Bărbulescu <sup>1</sup>, Lucica Barbeș <sup>2,\*</sup> and Cristian Ștefan Dumitriu <sup>3,\*</sup>

<sup>1</sup> Department of Civil Engineering, Transilvania University of Brașov, 5 Turnului Street, 900152 Brașov, Romania; alina.barbulescu@unitbv.ro

<sup>2</sup> Department of Chemistry and Chemical Engineering, Faculty of Applied Sciences, Ovidius University of Constanța, 124 Mamaia Bd., 900527 Constanța, Romania

<sup>3</sup> SC Utilnavorep SA, 55 Aurel Vlaicu Av., 900055 Constanta, Romania

\* Correspondence: lbarbes@univ-ovidius.ro (L.B.); dumitriu@utilnavorep.ro (C.Ș.D.)

**Table S1.** Positive and negative effects of the molecules in Group 1, and the probabilities of their activities.

| CID       | Positive effects |                                                        | Negative effects |                         |
|-----------|------------------|--------------------------------------------------------|------------------|-------------------------|
|           | <i>Pa</i>        | Effect                                                 | <i>Pa</i>        | Effect                  |
| 9889172   | 0.473            | Analgesic. non-opioid                                  | 0.445            | Cyanosis                |
|           | 0.462            | Cannabinoid receptor antagonist                        | 0.392            | Nail discoloration      |
|           | 0.448            | Analgesic                                              | 0.354            | Torsades de pointes     |
|           | 0.425            | Sigma receptor antagonist                              |                  |                         |
|           | 0.386            | Antineoplastic alkaloid                                |                  |                         |
|           | 0.326            | Glycosylphosphatidylinositol phospholipase D inhibitor |                  |                         |
|           | 0.319            | Lymphocytopoiesis inhibitor                            |                  |                         |
|           | 0.319            | Prostate disorders treatment                           |                  |                         |
|           | 0.318            | Peptide agonist                                        |                  |                         |
|           | 0.318            | Thromboxane B2 antagonist                              |                  |                         |
|           | 0.303            | NADPH-cytochrome-c2 reductase inhibitor                |                  |                         |
| 117587582 | 0.466            | Chemosensitizer                                        | 0.481            | Thrombocytopenia        |
|           | 0.464            | Pseudolysin inhibitor                                  | 0.479            | Hypotension             |
|           | 0.414            | CYP1A2 substrate                                       | 0.469            | Fibrillation. atrial    |
|           | 0.397            | Antineoplastic (breast cancer)                         | 0.447            | Sneezing                |
|           | 0.38             | Endopeptidase So inhibitor                             | 0.441            | Dyskinesia              |
|           | 0.378            | Glycosylphosphatidylinositol phospholipase D inhibitor | 0.429            | Neurotoxic              |
|           | 0.366            | Analgesic                                              | 0.429            | Thrombophlebitis        |
|           | 0.357            | CYP1A substrate                                        | 0.428            | Optic neuropathy        |
|           | 0.352            | Antiinfective                                          | 0.424            | Toxic. respiration      |
|           | 0.342            | Glutamyl endopeptidase II inhibitor                    | 0.417            | Paralysis               |
|           | 0.328            | DNA synthesis inhibitor                                | 0.406            | Hepatotoxic             |
|           | 0.321            | Thromboxane B2 antagonist                              | 0.406            | Necrosis                |
|           | 0.318            | Peptide agonist                                        | 0.391            | Dermatitis              |
|           | 0.316            | Antiviral (Picornavirus)                               | 0.388            | Ocular toxicity         |
|           | 0.31             | CYP2C8 substrate                                       | 0.38             | Photoallergy dermatitis |
|           | 0.307            | Venombin AB inhibitor                                  | 0.377            | Endocrine disruptor     |
|           | 0.303            | NADPH-cytochrome-c2 reductase inhibitor                | 0.373            | Optic neuritis          |
|           |                  |                                                        | 0.372            | Emetic                  |
|           |                  |                                                        | 0.348            | Pulmonary edema         |
|           |                  |                                                        | 0.341            | Torsades de pointes     |

|          |       |                                               |       |                                    |
|----------|-------|-----------------------------------------------|-------|------------------------------------|
|          |       |                                               | 0.341 | Nail discoloration                 |
|          |       |                                               | 0.33  | Fatty liver                        |
|          |       |                                               | 0.327 | Keratopathy                        |
|          |       |                                               | 0.322 | Nausea                             |
|          |       |                                               | 0.317 | Gastrointestinal disturbance       |
|          |       |                                               | 0.317 | Toxic. gastrointestinal            |
|          |       |                                               | 0.314 | Allergic contact dermatitis        |
|          |       |                                               | 0.301 | Hematotoxic                        |
| 10226340 | 0.491 | Amyotrophic lateral sclerosis treatment       | 0.474 | Choreoathetosis                    |
|          | 0.381 | Histamine release stimulant                   | 0.42  | Torsades de pointes                |
|          | 0.371 | (R)-6-hydroxynicotine oxidase inhibitor       | 0.403 | Paralysis                          |
|          | 0.363 | CYP2H substrate                               | 0.382 | Urinary retention                  |
|          | 0.349 | Neurotransmitter uptake inhibitor             | 0.381 | Xerostomia                         |
|          | 0.341 | Octopamine antagonist                         | 0.376 | Nephrotic syndrome                 |
|          | 0.326 | Systemic lupus erythematosus treatment        | 0.36  | Postural (orthostatic) hypotension |
|          | 0.315 | Vascular (periferal) disease treatment        | 0.349 | Bradycardic                        |
|          | 0.312 | P-glycoprotein substrate                      | 0.331 | Dizziness                          |
|          | 0.305 | Platelet adhesion inhibitor                   | 0.328 | Sensory disturbance                |
|          | 0.303 | Lymphocytopoiesis inhibitor                   | 0.324 | Asthma                             |
|          | 0.303 | Antiviral (Picornavirus)                      | 0.312 | Photoallergy dermatitis            |
|          | 0.301 | Nicotinic alpha4beta2 receptor antagonist     | 0.307 | Yawning                            |
|          | 0.301 | Cognition disorders treatment                 | 0.3   | Laryngospasm                       |
|          | 0.301 | Ovulation inhibitor                           |       |                                    |
| 57507911 | 0.487 | CYP2C18 substrate                             | 0.494 | Hypotonia                          |
|          | 0.48  | Prostate disorders treatment                  | 0.489 | Nephritis                          |
|          | 0.471 | Ubiquinol-cytochrome-c reductase inhibitor    | 0.488 | Urinary retention                  |
|          | 0.468 | Acetylcholine neuromuscular blocking agent    | 0.482 | Toxic. respiration                 |
|          | 0.46  | CYP2D6 substrate                              | 0.48  | Choreoathetosis                    |
|          | 0.456 | Platelet adhesion inhibitor                   | 0.477 | Hepatitis                          |
|          | 0.455 | Polyporopepsin inhibitor                      | 0.462 | Bradycardic                        |
|          | 0.454 | Oxidoreductase inhibitor                      | 0.461 | Sweating                           |
|          | 0.453 | Lipid metabolism regulator                    | 0.459 | Edema                              |
|          | 0.451 | Platelet aggregation stimulant                | 0.448 | Postural (orthostatic) hypotension |
|          | 0.45  | Sulfur reductase inhibitor                    | 0.44  | Dizziness                          |
|          | 0.449 | Carboxypeptidase Taq inhibitor                | 0.439 | Interstitial nephritis             |
|          | 0.442 | Antinociceptive                               | 0.43  | Optic neuropathy                   |
|          | 0.436 | CYP2D substrate                               | 0.429 | Bronchoconstrictor                 |
|          | 0.434 | Plastoquinol-plastocyanin reductase inhibitor | 0.424 | Optic neuritis                     |
|          | 0.431 | Antihypoxic                                   | 0.421 | Sensory disturbance                |
|          | 0.431 | Fructose 5-dehydrogenase inhibitor            | 0.415 | Asthma                             |
|          | 0.429 | Glycerol-ether monooxygenase inhibitor        | 0.41  | Dysarthria                         |
|          | 0.429 | Ovulation inhibitor                           | 0.409 | Visual acuity impairment           |
|          | 0.429 | Membrane permeability inhibitor               | 0.405 | Stomatitis                         |
|          | 0.423 | MMP9 expression inhibitor                     | 0.404 | Hypercholesterolemic               |
|          | 0.418 | 2-Hydroxyquinoline 8-monooxygenase inhibitor  | 0.403 | Gastrointestinal disturbance       |
|          | 0.417 | Antiviral (Picornavirus)                      | 0.399 | Cholestasis                        |
|          | 0.414 | CYP2C9 substrate                              | 0.395 | Diarrhea                           |
|          | 0.41  | Antiinfective                                 | 0.394 | Ocular toxicity                    |
|          | 0.409 | Fusarinine-C ornithinesterase inhibitor       | 0.392 | Ulceration                         |

|  |       |                                                            |       |                          |
|--|-------|------------------------------------------------------------|-------|--------------------------|
|  | 0.407 | Gonadotropin antagonist                                    | 0.392 | Necrosis                 |
|  | 0.399 | Antineoplastic (uterine cancer)                            | 0.39  | Fatty liver              |
|  | 0.389 | CYP2C8 inhibitor                                           | 0.389 | Nail discoloration       |
|  | 0.387 | Insulysin inhibitor                                        | 0.386 | Torticollis              |
|  | 0.384 | CYP1A2 inhibitor                                           | 0.385 | Sedative                 |
|  | 0.382 | Leukotriene-C4 synthase inhibitor                          | 0.38  | Inflammation             |
|  | 0.381 | TNF expression inhibitor                                   | 0.38  | Headache                 |
|  | 0.381 | CYP2C substrate                                            | 0.379 | Cardiodepressant         |
|  | 0.381 | 4-Nitrophenol 2-monooxygenase inhibitor                    | 0.379 | Akathisia                |
|  | 0.375 | CYP1A inhibitor                                            | 0.377 | Cataract                 |
|  | 0.374 | Phobic disorders treatment                                 | 0.377 | Excitability             |
|  | 0.372 | Eye irritation, inactive                                   | 0.374 | Euphoria                 |
|  | 0.37  | CYP2H substrate                                            | 0.372 | Nephrotic syndrome       |
|  | 0.367 | ATP-binding cassette A1 stimulant                          | 0.369 | Weight loss              |
|  | 0.367 | Antineurogenic pain                                        | 0.368 | Sleep disturbance        |
|  | 0.367 | CYP2C8 substrate                                           | 0.364 | Paralysis                |
|  | 0.366 | Glycosylphosphatidylinositol phospholipase D inhibitor     | 0.363 | Keratopathy              |
|  | 0.364 | N-methyl-2-oxoglutaramate hydrolase inhibitor              | 0.358 | Withdrawal               |
|  | 0.36  | Nicotine dehydrogenase inhibitor                           | 0.35  | Retroperitoneal fibrosis |
|  | 0.359 | Histamine release stimulant                                | 0.349 | Weight gain              |
|  | 0.357 | Antinephritic                                              | 0.348 | Ulcer, gastric           |
|  | 0.357 | Membrane integrity antagonist                              | 0.347 | Porphyria                |
|  | 0.357 | CYP2J2 substrate                                           | 0.347 | Chorea                   |
|  | 0.356 | Caspase 8 stimulant                                        | 0.347 | Pain                     |
|  | 0.355 | Antiviral (Rhinovirus)                                     | 0.346 | Hyperthermic             |
|  | 0.352 | 5 Hydroxytryptamine uptake stimulant                       | 0.344 | Yawning                  |
|  | 0.351 | Nitrate reductase (cytochrome) inhibitor                   | 0.343 | Weakness                 |
|  | 0.351 | Octopamine antagonist                                      | 0.339 | Acidosis                 |
|  | 0.349 | Endopeptidase So inhibitor                                 | 0.337 | Extrapyrasidal effect    |
|  | 0.348 | CYP2B10 substrate                                          | 0.333 | Thrombocytopenia         |
|  | 0.348 | Electron-transferring-flavoprotein dehydrogenase inhibitor | 0.331 | Laryngospasm             |
|  | 0.347 | HERG 1 channel blocker                                     | 0.328 | Galactorrhea             |
|  | 0.347 | HIF1A expression inhibitor                                 | 0.328 | Depression               |
|  | 0.347 | Thioredoxin inhibitor                                      | 0.324 | Ulcer, peptic            |
|  | 0.346 | 27-Hydroxycholesterol 7alpha-monooxygenase inhibitor       | 0.321 | Hypotension              |
|  | 0.342 | Intermittent claudication treatment                        | 0.319 | Hyperglycemic            |
|  | 0.34  | Interleukin 2 agonist                                      | 0.316 | Anorexiant               |
|  | 0.34  | APOA1 expression enhancer                                  | 0.315 | Multiple organ failure   |
|  | 0.338 | Sugar-phosphatase inhibitor                                | 0.313 | Piloerection             |
|  | 0.337 | Gluconate 5-dehydrogenase inhibitor                        | 0.313 | Endocrine disruptor      |
|  | 0.336 | CYP2E1 inducer                                             | 0.311 | QT interval prolongation |
|  | 0.334 | Pin1 inhibitor                                             | 0.308 | Tachycardiac             |
|  | 0.332 | Pseudolysin inhibitor                                      | 0.306 | Hypnotic                 |
|  | 0.33  | Beta-adrenergic receptor kinase inhibitor                  | 0.305 | Palpitation              |
|  | 0.33  | G-protein-coupled receptor kinase inhibitor                | 0.3   | Drowsiness               |
|  | 0.329 | Antiviral (Adenovirus)                                     |       |                          |
|  | 0.329 | 1-Acylglycerol-3-phosphate O-acyltransferase inhibitor     |       |                          |

|          |       |                                                           |       |                        |
|----------|-------|-----------------------------------------------------------|-------|------------------------|
|          | 0.329 | All-trans-retinyl-palmitate hydrolase inhibitor           |       |                        |
|          | 0.329 | Hydroxylamine oxidase inhibitor                           |       |                        |
|          | 0.329 | Spermidine dehydrogenase inhibitor                        |       |                        |
|          | 0.328 | Inotropic                                                 |       |                        |
|          | 0.326 | TRKB antagonist                                           |       |                        |
|          | 0.326 | MAP kinase stimulant                                      |       |                        |
|          | 0.321 | Mucositis treatment                                       |       |                        |
|          | 0.319 | Antineoplastic alkaloid                                   |       |                        |
|          | 0.319 | 5 Hydroxytryptamine 2B agonist                            |       |                        |
|          | 0.319 | CYP1A2 substrate                                          |       |                        |
|          | 0.319 | Oxygen scavenger                                          |       |                        |
|          | 0.319 | Macrophage colony stimulating factor agonist              |       |                        |
|          | 0.317 | Nicotinate dehydrogenase inhibitor                        |       |                        |
|          | 0.317 | General pump inhibitor                                    |       |                        |
|          | 0.316 | Calcium channel activator                                 |       |                        |
|          | 0.316 | Sigma receptor agonist                                    |       |                        |
|          | 0.316 | Vanilloid 1 agonist                                       |       |                        |
|          | 0.315 | 15-Hydroxyprostaglandin-D dehydrogenase (NADP+) inhibitor |       |                        |
|          | 0.315 | CYP4A substrate                                           |       |                        |
|          | 0.315 | CYP2J substrate                                           |       |                        |
|          | 0.314 | CYP3A4 substrate                                          |       |                        |
|          | 0.313 | Antiprotozoal (Leishmania)                                |       |                        |
|          | 0.312 | Indanol dehydrogenase inhibitor                           |       |                        |
|          | 0.312 | Antiinflammatory. intestinal                              |       |                        |
|          | 0.312 | Prion diseases treatment                                  |       |                        |
|          | 0.309 | 1.4-Lactonase inhibitor                                   |       |                        |
|          | 0.308 | Phenol O-methyltransferase inhibitor                      |       |                        |
|          | 0.308 | Vasodilator. peripheral                                   |       |                        |
|          | 0.307 | Caspase 3 stimulant                                       |       |                        |
|          | 0.306 | Reductant                                                 |       |                        |
|          | 0.306 | Mediator release inhibitor                                |       |                        |
|          | 0.306 | CYP3A3 substrate                                          |       |                        |
|          | 0.306 | CYP2D15 substrate                                         |       |                        |
|          | 0.303 | Neuropeptide Y2 antagonist                                |       |                        |
|          | 0.302 | Urethanase inhibitor                                      |       |                        |
|          | 0.302 | Phosphatidylinositol diacylglycerol-lyase inhibitor       |       |                        |
|          | 0.302 | Glutathione thiolesterase inhibitor                       |       |                        |
|          | 0.301 | Polarisation inhibitor                                    |       |                        |
|          | 0.3   | Choline-phosphate cytidyltransferase inhibitor            |       |                        |
|          | 0.3   | 5 Hydroxytryptamine release inhibitor                     |       |                        |
| 56841530 | 0.495 | Platelet adhesion inhibitor                               | 0.498 | Xerostomia             |
|          | 0.491 | Saccharopepsin inhibitor                                  | 0.468 | Dysphoria              |
|          | 0.491 | Chymosin inhibitor                                        | 0.466 | Fibrosis. interstitial |
|          | 0.491 | Acrocyllindropepsin inhibitor                             | 0.466 | Extrapyrarnidal effect |
|          | 0.49  | Amine dehydrogenase inhibitor                             | 0.466 | Delirium               |
|          | 0.476 | CYP2C18 substrate                                         | 0.461 | Pseudoporphyria        |

|  |       |                                               |       |                                    |
|--|-------|-----------------------------------------------|-------|------------------------------------|
|  | 0.449 | Carboxypeptidase Taq inhibitor                | 0.461 | Conjunctivitis                     |
|  | 0.448 | Antihypoxic                                   | 0.449 | Dystonia                           |
|  | 0.44  | Prostate disorders treatment                  | 0.448 | Hypothermic                        |
|  | 0.438 | Antineoplastic (uterine cancer)               | 0.444 | Urinary retention                  |
|  | 0.433 | CYP1A2 inhibitor                              | 0.435 | Nephritis                          |
|  | 0.423 | CYP2D6 substrate                              | 0.433 | Hematuria                          |
|  | 0.422 | CYP1A inhibitor                               | 0.424 | Cyanosis                           |
|  | 0.422 | Sulfur reductase inhibitor                    | 0.418 | Hypercholesterolemic               |
|  | 0.422 | Antinociceptive                               | 0.415 | Fibrillation. atrial               |
|  | 0.416 | Platelet aggregation stimulant                | 0.407 | Toxic. respiration                 |
|  | 0.415 | Acetylcholine neuromuscular blocking agent    | 0.406 | Bradycardic                        |
|  | 0.409 | Fusarinine-C ornithinesterase inhibitor       | 0.397 | Edema                              |
|  | 0.403 | Polyporopepsin inhibitor                      | 0.393 | Hepatitis                          |
|  | 0.403 | Ubiquinol-cytochrome-c reductase inhibitor    | 0.389 | Weight gain                        |
|  | 0.402 | CYP2D substrate                               | 0.389 | Postural (orthostatic) hypotension |
|  | 0.4   | Gonadotropin antagonist                       | 0.389 | Nail discoloration                 |
|  | 0.4   | Glyceryl-ether monooxygenase inhibitor        | 0.388 | Torticollis                        |
|  | 0.393 | Plastoquinol-plastocyanin reductase inhibitor | 0.386 | Weight loss                        |
|  | 0.393 | Fructose 5-dehydrogenase inhibitor            | 0.385 | Interstitial nephritis             |
|  | 0.393 | Antiviral (Picornavirus)                      | 0.378 | Bronchoconstrictor                 |
|  | 0.391 | CYP2C9 substrate                              | 0.375 | Gastrointestinal disturbance       |
|  | 0.388 | Octopamine antagonist                         | 0.374 | Dizziness                          |
|  | 0.38  | 2-Hydroxyquinoline 8-monooxygenase inhibitor  | 0.371 | Akathisia                          |
|  | 0.495 | Platelet adhesion inhibitor                   | 0.369 | Visual acuity impairment           |
|  | 0.491 | Saccharopepsin inhibitor                      | 0.367 | Optic neuropathy                   |
|  | 0.491 | Chymosin inhibitor                            | 0.365 | Cholestasis                        |
|  | 0.491 | Acrocyllindropepsin inhibitor                 | 0.365 | Choreoathetosis                    |
|  | 0.49  | Amine dehydrogenase inhibitor                 | 0.364 | Porphyria                          |
|  | 0.476 | CYP2C18 substrate                             | 0.364 | Hypotonia                          |
|  | 0.449 | Carboxypeptidase Taq inhibitor                | 0.362 | Optic neuritis                     |
|  | 0.448 | Antihypoxic                                   | 0.355 | Ulcer. gastric                     |
|  | 0.44  | Prostate disorders treatment                  | 0.351 | Excitability                       |
|  | 0.438 | Antineoplastic (uterine cancer)               | 0.348 | Endocrine disruptor                |
|  | 0.433 | CYP1A2 inhibitor                              | 0.348 | Euphoria                           |
|  | 0.423 | CYP2D6 substrate                              | 0.348 | Depression                         |
|  | 0.422 | CYP1A inhibitor                               | 0.346 | Sensory disturbance                |
|  | 0.422 | Sulfur reductase inhibitor                    | 0.343 | Stomatitis                         |
|  | 0.422 | Antinociceptive                               | 0.342 | Cardiodepressant                   |
|  | 0.416 | Platelet aggregation stimulant                | 0.341 | Laryngospasm                       |
|  | 0.415 | Acetylcholine neuromuscular blocking agent    | 0.34  | Ocular toxicity                    |
|  | 0.409 | Fusarinine-C ornithinesterase inhibitor       | 0.34  | Asthma                             |
|  | 0.403 | Polyporopepsin inhibitor                      | 0.339 | Ulceration                         |
|  | 0.403 | Ubiquinol-cytochrome-c reductase inhibitor    | 0.339 | Dysarthria                         |
|  | 0.402 | CYP2D substrate                               | 0.336 | Acidosis                           |
|  | 0.4   | Gonadotropin antagonist                       | 0.336 | Galactorrhea                       |
|  | 0.4   | Glyceryl-ether monooxygenase inhibitor        | 0.333 | Ulcer. peptic                      |
|  | 0.393 | Plastoquinol-plastocyanin reductase inhibitor | 0.328 | Retroperitoneal fibrosis           |
|  | 0.393 | Fructose 5-dehydrogenase inhibitor            | 0.328 | Nephrotic syndrome                 |
|  | 0.393 | Antiviral (Picornavirus)                      | 0.324 | Sweating                           |

|  |       |                                                            |       |                        |
|--|-------|------------------------------------------------------------|-------|------------------------|
|  | 0.391 | CYP2C9 substrate                                           | 0.322 | Weakness               |
|  | 0.388 | Octopamine antagonist                                      | 0.32  | Piloerection           |
|  | 0.38  | 2-Hydroxyquinoline 8-monooxygenase inhibitor               | 0.32  | Cataract               |
|  | 0.379 | Oxidoreductase inhibitor                                   | 0.318 | Headache               |
|  | 0.377 | Ovulation inhibitor                                        | 0.315 | Fasciculation          |
|  | 0.375 | Lipid metabolism regulator                                 | 0.315 | Multiple organ failure |
|  | 0.374 | Phobic disorders treatment                                 | 0.314 | Sleep disturbance      |
|  | 0.37  | CYP2H substrate                                            | 0.31  | Diarrhea               |
|  | 0.366 | Glycosylphosphatidylinositol phospholipase D inhibitor     | 0.308 | Paralysis              |
|  | 0.364 | Leukotriene-C4 synthase inhibitor                          | 0.306 | Palpitation            |
|  | 0.359 | Histamine release stimulant                                | 0.304 | Fatty liver            |
|  | 0.357 | CYP2C8 inhibitor                                           | 0.303 | Inflammation           |
|  | 0.357 | CYP2J2 substrate                                           | 0.301 | Withdrawal             |
|  | 0.352 | 5 Hydroxytryptamine uptake stimulant                       |       |                        |
|  | 0.351 | 4-Nitrophenol 2-monooxygenase inhibitor                    |       |                        |
|  | 0.35  | Intermittent claudication treatment                        |       |                        |
|  | 0.349 | Endopeptidase So inhibitor                                 |       |                        |
|  | 0.348 | Electron-transferring-flavoprotein dehydrogenase inhibitor |       |                        |
|  | 0.347 | Membrane integrity antagonist                              |       |                        |
|  | 0.347 | Thioredoxin inhibitor                                      |       |                        |
|  | 0.344 | ATP-binding cassette A1 stimulant                          |       |                        |
|  | 0.338 | Sugar-phosphatase inhibitor                                |       |                        |
|  | 0.337 | Gluconate 5-dehydrogenase inhibitor                        |       |                        |
|  | 0.335 | MMP9 expression inhibitor                                  |       |                        |
|  | 0.334 | 5 Hydroxytryptamine 2B agonist                             |       |                        |
|  | 0.334 | Antithrombotic                                             |       |                        |
|  | 0.334 | Beta-adrenergic receptor kinase inhibitor                  |       |                        |
|  | 0.334 | G-protein-coupled receptor kinase inhibitor                |       |                        |
|  | 0.334 | Antiviral (Rhinovirus)                                     |       |                        |
|  | 0.332 | Nicotine dehydrogenase inhibitor                           |       |                        |
|  | 0.332 | APOA1 expression enhancer                                  |       |                        |
|  | 0.332 | Pseudolysin inhibitor                                      |       |                        |
|  | 0.33  | Aldehyde oxidase inhibitor                                 |       |                        |
|  | 0.329 | All-trans-retinyl-palmitate hydrolase inhibitor            |       |                        |
|  | 0.329 | Hydroxylamine oxidase inhibitor                            |       |                        |
|  | 0.328 | Antiinfective                                              |       |                        |
|  | 0.327 | N-methyl-2-oxoglutaramate hydrolase inhibitor              |       |                        |
|  | 0.327 | TNF expression inhibitor                                   |       |                        |
|  | 0.326 | Vanilloid 1 agonist                                        |       |                        |
|  | 0.325 | Caspase 8 stimulant                                        |       |                        |
|  | 0.325 | CYP2C8 substrate                                           |       |                        |
|  | 0.324 | CYP2C substrate                                            |       |                        |
|  | 0.324 | Nitrate reductase (cytochrome) inhibitor                   |       |                        |
|  | 0.322 | Eye irritation. inactive                                   |       |                        |
|  | 0.322 | 1-Acylglycerol-3-phosphate O-acyltransferase inhibitor     |       |                        |
|  | 0.322 | 5 Hydroxytryptamine release inhibitor                      |       |                        |

|          |       |                                                         |       |                          |
|----------|-------|---------------------------------------------------------|-------|--------------------------|
|          | 0.321 | Prion diseases treatment                                |       |                          |
|          | 0.321 | Mediator release inhibitor                              |       |                          |
|          | 0.321 | Mucositis treatment                                     |       |                          |
|          | 0.321 | 27-Hydroxycholesterol<br>7alpha-monooxygenase inhibitor |       |                          |
|          | 0.32  | Cytoprotectant                                          |       |                          |
|          | 0.319 | Oxygen scavenger                                        |       |                          |
|          | 0.319 | Macrophage colony stimulating factor ago-<br>nist       |       |                          |
|          | 0.318 | Antiinflammatory. intestinal                            |       |                          |
|          | 0.317 | Antinephritic                                           |       |                          |
|          | 0.316 | Antiviral (Adenovirus)                                  |       |                          |
|          | 0.315 | CYP2J substrate                                         |       |                          |
|          | 0.314 | Antineurogenic pain                                     |       |                          |
|          | 0.314 | Antidyskinetic                                          |       |                          |
|          | 0.311 | TRKB antagonist                                         |       |                          |
|          | 0.31  | CYP2B10 substrate                                       |       |                          |
|          | 0.31  | CYP2E1 inducer                                          |       |                          |
|          | 0.309 | Antineoplastic alkaloid                                 |       |                          |
|          | 0.308 | Neuropeptide Y2 antagonist                              |       |                          |
|          | 0.308 | Phenol O-methyltransferase inhibitor                    |       |                          |
|          | 0.307 | Antiprotozoal (Trypanosoma)                             |       |                          |
|          | 0.307 | Caspase 3 stimulant                                     |       |                          |
|          | 0.306 | Radioprotector                                          |       |                          |
|          | 0.302 | Urethanase inhibitor                                    |       |                          |
|          | 0.302 | Glutathione thiolesterase inhibitor                     |       |                          |
|          | 0.302 | Interleukin 2 agonist                                   |       |                          |
|          | 0.3   | CYP1A2 substrate                                        |       |                          |
| 57507905 | 0.493 | CYP2D6 substrate                                        | 0.499 | Hepatitis                |
|          | 0.486 | Prostate disorders treatment                            | 0.491 | Sweating                 |
|          | 0.484 | Gastrin inhibitor                                       | 0.483 | Fibrillation. atrial     |
|          | 0.482 | CYP2C18 substrate                                       | 0.471 | Bradycardic              |
|          | 0.468 | CYP2D substrate                                         | 0.466 | Interstitial nephritis   |
|          | 0.46  | Fructose 5-dehydrogenase inhibitor                      | 0.463 | Toxic. respiration       |
|          | 0.456 | 2-Hydroxyquinoline 8-monooxygenase in-<br>hibitor       | 0.458 | Hypercholesterolemic     |
|          | 0.444 | Ubiquinol-cytochrome-c reductase inhibitor              | 0.453 | Dysarthria               |
|          | 0.44  | Fusarinine-C ornithinesterase inhibitor                 | 0.45  | Stomatitis               |
|          | 0.438 | Antinociceptive                                         | 0.444 | Visual acuity impairment |
|          | 0.438 | Platelet adhesion inhibitor                             | 0.442 | Edema                    |
|          | 0.436 | Antihypoxic                                             | 0.441 | Dizziness                |
|          | 0.435 | Sulfur reductase inhibitor                              | 0.441 | Optic neuritis           |
|          | 0.432 | Lipid metabolism regulator                              | 0.439 | Optic neuropathy         |
|          | 0.431 | CYP2C9 substrate                                        | 0.425 | Fatty liver              |
|          | 0.428 | Platelet aggregation stimulant                          | 0.424 | Nail discoloration       |
|          | 0.426 | Polyporopepsin inhibitor                                | 0.42  | Bronchoconstrictor       |
|          | 0.419 | Antineoplastic (uterine cancer)                         | 0.419 | Sensory disturbance      |
|          | 0.419 | MMP9 expression inhibitor                               | 0.41  | Ulceration               |
|          | 0.418 | Oxidoreductase inhibitor                                | 0.408 | Cholestasis              |
|          | 0.417 | Ovulation inhibitor                                     | 0.406 | Asthma                   |
|          | 0.414 | Carboxypeptidase Taq inhibitor                          | 0.406 | Withdrawal               |
|          | 0.411 | Plastoquinol-plastocyanin reductase inhibi-             | 0.404 | Extrapyramidal effect    |

|  |       |                                                            |       |                              |
|--|-------|------------------------------------------------------------|-------|------------------------------|
|  |       | tor                                                        |       |                              |
|  | 0.411 | 4-Nitrophenol 2-monooxygenase inhibitor                    | 0.404 | Necrosis                     |
|  | 0.411 | Antiviral (Picornavirus)                                   | 0.4   | Nephrotic syndrome           |
|  | 0.409 | Gonadotropin antagonist                                    | 0.399 | Chorea                       |
|  | 0.409 | Insulysin inhibitor                                        | 0.398 | Paralysis                    |
|  | 0.409 | Glycosylphosphatidylinositol phospholipase D inhibitor     | 0.392 | Sedative                     |
|  | 0.398 | Membrane permeability inhibitor                            | 0.392 | Gastrointestinal disturbance |
|  | 0.397 | CYP1A2 inhibitor                                           | 0.39  | Akathisia                    |
|  | 0.389 | Antiinfective                                              | 0.385 | Headache                     |
|  | 0.388 | CYP1A inhibitor                                            | 0.384 | Cataract                     |
|  | 0.385 | Nicotine dehydrogenase inhibitor                           | 0.384 | Ocular toxicity              |
|  | 0.384 | CYP2H substrate                                            | 0.383 | Diarrhea                     |
|  | 0.383 | Antineurogenic pain                                        | 0.38  | Torticollis                  |
|  | 0.382 | CYP2C substrate                                            | 0.379 | Ulcer. gastric               |
|  | 0.38  | Thioredoxin inhibitor                                      | 0.376 | Cardiodepressant             |
|  | 0.379 | CYP2C8 inhibitor                                           | 0.372 | Retroperitoneal fibrosis     |
|  | 0.378 | ATP-binding cassette A1 stimulant                          | 0.37  | Excitability                 |
|  | 0.378 | Glyceryl-ether monooxygenase inhibitor                     | 0.369 | Euphoria                     |
|  | 0.377 | Electron-transferring-flavoprotein dehydrogenase inhibitor | 0.361 | Keratopathy                  |
|  | 0.372 | Octopamine antagonist                                      | 0.36  | Weight gain                  |
|  | 0.371 | TNF expression inhibitor                                   | 0.358 | Weight loss                  |
|  | 0.371 | 27-Hydroxycholesterol 7alpha-monooxygenase inhibitor       | 0.357 | Ulcer. peptic                |
|  | 0.37  | HIF1A expression inhibitor                                 | 0.357 | Yawning                      |
|  | 0.367 | Leukotriene-C4 synthase inhibitor                          | 0.357 | Acidosis                     |
|  | 0.365 | Sigma receptor agonist                                     | 0.356 | Inflammation                 |
|  | 0.364 | CYP2C8 substrate                                           | 0.355 | Hyperglycemic                |
|  | 0.362 | Pin1 inhibitor                                             | 0.354 | Porphyria                    |
|  | 0.359 | Pseudolysin inhibitor                                      | 0.354 | Sleep disturbance            |
|  | 0.357 | Spermidine dehydrogenase inhibitor                         | 0.354 | Thrombocytopenia             |
|  | 0.356 | HERG 1 channel blocker                                     | 0.35  | Multiple organ failure       |
|  | 0.355 | Antinephritic                                              | 0.348 | Depression                   |
|  | 0.353 | APOA1 expression enhancer                                  | 0.348 | Pain                         |
|  | 0.352 | 5 Hydroxytryptamine 2B agonist                             | 0.345 | Weakness                     |
|  | 0.351 | MAP kinase stimulant                                       | 0.342 | Hypomania                    |
|  | 0.347 | Inotropic                                                  | 0.342 | Respiratory impairment       |
|  | 0.345 | Eye irritation. inactive                                   | 0.336 | Palpitation                  |
|  | 0.345 | Nicotinate dehydrogenase inhibitor                         | 0.335 | Piloerection                 |
|  | 0.345 | Caspase 8 stimulant                                        | 0.335 | Hyperthermic                 |
|  | 0.342 | Phobic disorders treatment                                 | 0.334 | Laryngospasm                 |
|  | 0.341 | N-methyl-2-oxoglutaramate hydrolase inhibitor              | 0.325 | Psychomotor impairment       |
|  | 0.341 | Phenol O-methyltransferase inhibitor                       | 0.322 | QT interval prolongation     |
|  | 0.341 | Glutathione thiolesterase inhibitor                        | 0.322 | Anorexiant                   |
|  | 0.34  | 5 Hydroxytryptamine uptake stimulant                       | 0.321 | Fasciculation                |
|  | 0.339 | CYP1A2 substrate                                           | 0.319 | Tachycardiac                 |
|  | 0.338 | Antineoplastic alkaloid                                    | 0.318 | Hypnotic                     |
|  | 0.338 | Indanol dehydrogenase inhibitor                            | 0.316 | Hypotension                  |
|  | 0.338 | Nitrate reductase (cytochrome) inhibitor                   | 0.316 | Galactorrhea                 |
|  | 0.335 | Intermittent claudication treatment                        | 0.314 | Coma                         |

|  |       |                                                           |       |                     |
|--|-------|-----------------------------------------------------------|-------|---------------------|
|  | 0.335 | Histamine release stimulant                               | 0.307 | Glaucoma            |
|  | 0.334 | TRKB antagonist                                           | 0.306 | Endocrine disruptor |
|  | 0.332 | CYP3A4 substrate                                          | 0.306 | Sialorrhea          |
|  | 0.332 | 1,4-Lactonase inhibitor                                   |       |                     |
|  | 0.331 | CYP2B10 substrate                                         |       |                     |
|  | 0.33  | CYP2J2 substrate                                          |       |                     |
|  | 0.328 | Antiviral (Rhinovirus)                                    |       |                     |
|  | 0.327 | Beta-adrenergic receptor kinase inhibitor                 |       |                     |
|  | 0.327 | G-protein-coupled receptor kinase inhibitor               |       |                     |
|  | 0.326 | CYP2D15 substrate                                         |       |                     |
|  | 0.324 | Antiviral (Adenovirus)                                    |       |                     |
|  | 0.323 | Membrane integrity antagonist                             |       |                     |
|  | 0.323 | Complement factor D inhibitor                             |       |                     |
|  | 0.322 | 1-Acylglycerol-3-phosphate<br>O-acyltransferase inhibitor |       |                     |
|  | 0.322 | Feruloyl esterase inhibitor                               |       |                     |
|  | 0.321 | Steroid N-acetylglucosaminyltransferase<br>inhibitor      |       |                     |
|  | 0.321 | CYP2E1 inducer                                            |       |                     |
|  | 0.321 | Endopeptidase So inhibitor                                |       |                     |
|  | 0.317 | Interleukin 2 agonist                                     |       |                     |
|  | 0.316 | CYP2D2 inhibitor                                          |       |                     |
|  | 0.315 | Nicotinic alpha6beta3beta4alpha5 receptor<br>antagonist   |       |                     |
|  | 0.314 | Mediator release inhibitor                                |       |                     |
|  | 0.311 | CYP3A substrate                                           |       |                     |
|  | 0.31  | Prion diseases treatment                                  |       |                     |
|  | 0.31  | Sugar-phosphatase inhibitor                               |       |                     |
|  | 0.309 | CF transmembrane conductance regulator<br>agonist         |       |                     |
|  | 0.309 | Hydroxylamine oxidase inhibitor                           |       |                     |
|  | 0.309 | JAK2 expression inhibitor                                 |       |                     |
|  | 0.308 | Trimethylamine-oxide aldolase inhibitor                   |       |                     |
|  | 0.307 | Calcium channel activator                                 |       |                     |
|  | 0.307 | Gluconate 5-dehydrogenase inhibitor                       |       |                     |
|  | 0.307 | Oxygen scavenger                                          |       |                     |
|  | 0.306 | Monoamine uptake inhibitor                                |       |                     |
|  | 0.306 | Neuropeptide Y2 antagonist                                |       |                     |
|  | 0.306 | Caspase 3 stimulant                                       |       |                     |
|  | 0.306 | General pump inhibitor                                    |       |                     |
|  | 0.305 | CYP3A3 substrate                                          |       |                     |
|  | 0.305 | Neurotransmitter antagonist                               |       |                     |
|  | 0.304 | All-trans-retinyl-palmitate hydrolase inhib-<br>itor      |       |                     |
|  | 0.304 | P-glycoprotein substrate                                  |       |                     |
|  | 0.304 | Macrophage colony stimulating factor ago-<br>nist         |       |                     |
|  | 0.304 | Ribulose-phosphate 3-epimerase inhibitor                  |       |                     |
|  | 0.303 | Lysase inhibitor                                          |       |                     |
|  | 0.303 | Mucositis treatment                                       |       |                     |
|  | 0.302 | Lysyl oxidase inhibitor                                   |       |                     |
|  | 0.301 | Polarization inhibitor                                    |       |                     |

|       |       |                                                         |       |                             |
|-------|-------|---------------------------------------------------------|-------|-----------------------------|
| 56463 | 0.483 | 5 Hydroxytryptamine release stimulant                   | 0.485 | Hyperglycemic               |
|       | 0.469 | Sigma receptor agonist                                  | 0.464 | Urinary retention           |
|       | 0.469 | Acetylcholine neuromuscular blocking agent              | 0.456 | Hypomania                   |
|       | 0.457 | Thromboxane B2 antagonist                               | 0.441 | Photoallergy dermatitis     |
|       | 0.455 | HIF1A expression inhibitor                              | 0.44  | Ulceration                  |
|       | 0.44  | Rhinitis treatment                                      | 0.429 | Asthma                      |
|       | 0.434 | Antinociceptive                                         | 0.421 | Allergic contact dermatitis |
|       | 0.431 | Antiinflammatory                                        | 0.415 | Choreoathetosis             |
|       | 0.429 | Lipid metabolism regulator                              | 0.412 | Fibrosis. interstitial      |
|       | 0.415 | Heat shock protein 27 antagonist                        | 0.412 | Xerostomia                  |
|       | 0.411 | Cannabinoid receptor antagonist                         | 0.411 | Thrombocytopenia            |
|       | 0.391 | CYP2C19 inhibitor                                       | 0.41  | Interstitial nephritis      |
|       | 0.391 | Transcription factor STAT inhibitor                     | 0.402 | Hypercholesterolemic        |
|       | 0.38  | Platelet adhesion inhibitor                             | 0.4   | Ulcer. gastric              |
|       | 0.373 | Histamine release stimulant                             | 0.4   | Weakness                    |
|       | 0.369 | Glyoxylate reductase inhibitor                          | 0.396 | Hematuria                   |
|       | 0.365 | Antihypoxic                                             | 0.388 | Hypothermic                 |
|       | 0.363 | Vasodilator. coronary                                   | 0.385 | Weight loss                 |
|       | 0.363 | Octopamine antagonist                                   | 0.384 | Extrapyramidal effect       |
|       | 0.362 | Platelet aggregation inhibitor                          | 0.381 | Torsades de pointes         |
|       | 0.36  | Platelet aggregation stimulant                          | 0.38  | Sweating                    |
|       | 0.359 | Vasodilator. peripheral                                 | 0.378 | Bradycardic                 |
|       | 0.357 | Antianginal                                             | 0.376 | Stomatitis                  |
|       | 0.356 | CYP2C18 substrate                                       | 0.374 | Nephrotic syndrome          |
|       | 0.349 | Transcription factor STAT3 inhibitor                    | 0.373 | Ulcer. peptic               |
|       | 0.347 | HMGCS2 expression enhancer                              | 0.371 | Gastrointestinal hemorrhage |
|       | 0.347 | General pump inhibitor                                  | 0.366 | Hypotension                 |
|       | 0.339 | Prostate disorders treatment                            | 0.346 | Laryngospasm                |
|       | 0.335 | Monoamine uptake inhibitor                              | 0.339 | Cardiodepressant            |
|       | 0.335 | MMP9 expression inhibitor                               | 0.339 | Retroperitoneal fibrosis    |
|       | 0.334 | Inotropic                                               | 0.339 | Withdrawal                  |
|       | 0.329 | CYP2D15 substrate                                       | 0.337 | Hypotonia                   |
|       | 0.326 | Antineoplastic (uterine cancer)                         | 0.335 | Hyperthermic                |
|       | 0.324 | 4-Nitrophenol 2-monooxygenase inhibitor                 | 0.335 | Pain                        |
|       | 0.32  | Spasmolytic. Papaverin-like                             | 0.333 | Thrombophlebitis            |
|       | 0.319 | Cyclohexanone monooxygenase inhibitor                   | 0.332 | Torticollis                 |
|       | 0.316 | 27-Hydroxycholesterol<br>7alpha-monooxygenase inhibitor | 0.312 | QT interval prolongation    |
|       | 0.315 | Antineurogenic pain                                     | 0.312 | Glaucoma                    |
|       | 0.314 | Imidazoline I1 receptor agonist                         | 0.309 | Akathisia                   |
|       | 0.314 | Fibrinolytic                                            | 0.303 | Pseudoporphyria             |
|       | 0.312 | Chemosensitizer                                         |       |                             |
|       | 0.312 | Antiviral (Picornavirus)                                |       |                             |
|       | 0.312 | Fusarinine-C ornithinesterase inhibitor                 |       |                             |
|       | 0.31  | Taurine dehydrogenase inhibitor                         |       |                             |
|       | 0.307 | Mediator release inhibitor                              |       |                             |
|       | 0.305 | Amine dehydrogenase inhibitor                           |       |                             |
|       | 0.303 | Dementia treatment                                      |       |                             |
|       | 0.303 | 1.4-Lactonase inhibitor                                 |       |                             |
|       | 0.301 | Antieczematic atopic                                    |       |                             |

**Table S2.** Positive and negative effects of the molecules in Group 2, and the probabilities of their activities.

|                 |       |                                                      |       |                             |
|-----------------|-------|------------------------------------------------------|-------|-----------------------------|
| <b>44397641</b> | 0.485 | Antiasthmatic                                        | 0.473 | Euphoria                    |
|                 | 0.483 | Gastrin inhibitor                                    | 0.470 | Myoclonus                   |
|                 | 0.479 | Polyporopepsin inhibitor                             | 0.468 | Weakness                    |
|                 | 0.477 | Saccharopepsin inhibitor                             | 0.465 | Hypercholesterolemic        |
|                 | 0.477 | Chymosin inhibitor                                   | 0.459 | Dysarthria                  |
|                 | 0.477 | Acrocylindropepsin inhibitor                         | 0.458 | Conjunctivitis              |
|                 | 0.474 | Calcium channel (voltage-sensitive) activator        | 0.449 | Weight gain                 |
|                 | 0.465 | Antinociceptive                                      | 0.448 | Acidosis                    |
|                 | 0.464 | CYP2H substrate                                      | 0.443 | Allergic contact dermatitis |
|                 | 0.451 | CYP2C18 substrate                                    | 0.438 | Photoallergy dermatitis     |
|                 | 0.451 | Amine dehydrogenase inhibitor                        | 0.436 | Akathisia                   |
|                 | 0.444 | Fibrinolytic                                         | 0.421 | Bradycardic                 |
|                 | 0.432 | Platelet aggregation stimulant                       | 0.417 | Hypotension                 |
|                 | 0.428 | Platelet adhesion inhibitor                          | 0.412 | Fibrosis. interstitial      |
|                 | 0.422 | Acetylcholine neuromuscular blocking agent           | 0.412 | Hypotonia                   |
|                 | 0.421 | Plastoquinol-plastocyanin reductase inhibitor        | 0.410 | Yawning                     |
|                 | 0.418 | Sulfur reductase inhibitor                           | 0.409 | Muscle weakness             |
|                 | 0.416 | Gonadotropin antagonist                              | 0.409 | Gastrointestinal hemorrhage |
|                 | 0.416 | Antidyskinetic                                       | 0.399 | Depression                  |
|                 | 0.415 | Prostate disorders treatment                         | 0.399 | Dizziness                   |
|                 | 0.411 | Ubiquinol-cytochrome-c reductase inhibitor           | 0.397 | Sneezing                    |
|                 | 0.408 | Rhinitis treatment                                   | 0.393 | Edema                       |
|                 | 0.402 | Antiviral (Picornavirus)                             | 0.391 | Tremor                      |
|                 | 0.401 | Ovulation inhibitor                                  | 0.388 | Tachycardiac                |
|                 | 0.401 | CYP2C8 inhibitor                                     | 0.385 | Retroperitoneal fibrosis    |
|                 | 0.397 | Benzoin aldolase inhibitor                           | 0.385 | Laryngospasm                |
|                 | 0.388 | Glyceryl-ether monooxygenase inhibitor               | 0.384 | Toxic. respiration          |
|                 | 0.387 | Nicotinic alpha6beta3beta4alpha5 receptor antagonist | 0.384 | Reproductive dysfunction    |
|                 | 0.385 | Histamine release stimulant                          | 0.383 | Nephritis                   |
|                 | 0.383 | Antipruritic                                         | 0.383 | Fibrillation. atrial        |
|                 | 0.377 | Antiviral (Rhinovirus)                               | 0.381 | Cholestasis                 |
|                 | 0.375 | Fructose 5-dehydrogenase inhibitor                   | 0.381 | Paralysis                   |
|                 | 0.370 | Antieczematic atopic                                 | 0.378 | Xerostomia                  |
|                 | 0.369 | Carboxypeptidase Taq inhibitor                       | 0.373 | Dysphoria                   |
|                 | 0.364 | Leukotriene-C4 synthase inhibitor                    | 0.373 | Visual acuity impairment    |
|                 | 0.363 | Membrane integrity antagonist                        | 0.368 | Hypomania                   |
|                 | 0.360 | Antiprotozoal (Leishmania)                           | 0.367 | Delirium                    |
|                 | 0.358 | Pin1 inhibitor                                       | 0.365 | Interstitial nephritis      |

|  |       |                                                           |       |                       |
|--|-------|-----------------------------------------------------------|-------|-----------------------|
|  | 0.357 | 1-Acylglycerol-3-phosphate O-acyltransferase inhibitor    | 0.363 | Necrosis              |
|  | 0.355 | Endopeptidase So inhibitor                                | 0.361 | Cyanosis              |
|  | 0.353 | 2-Hydroxyquinoline 8-monooxygenase inhibitor              | 0.360 | Sensory disturbance   |
|  | 0.351 | Fusarinine-C ornithinesterase inhibitor                   | 0.359 | Ulcer. gastric        |
|  | 0.347 | ATP-binding cassette A1 stimulant                         | 0.359 | Torticollis           |
|  | 0.343 | Membrane permeability inhibitor                           | 0.358 | Inflammation          |
|  | 0.342 | Caspase 8 stimulant                                       | 0.350 | Hepatitis             |
|  | 0.340 | 27-Hydroxycholesterol 7alpha-monooxygenase inhibitor      | 0.347 | Ulcer. peptic         |
|  | 0.340 | CYP2J2 substrate                                          | 0.344 | Dependence            |
|  | 0.339 | 15-Hydroxyprostaglandin-D dehydrogenase (NADP+) inhibitor | 0.344 | Dystonia              |
|  | 0.339 | MAP kinase stimulant                                      | 0.344 | Asthma                |
|  | 0.337 | Antitussive. narcotic                                     | 0.342 | Extrapyramidal effect |
|  | 0.337 | Intermittent claudication treatment                       | 0.339 | Optic neuropathy      |
|  | 0.336 | CYP2C19 inhibitor                                         | 0.338 | Ocular toxicity       |
|  | 0.336 | Dermatologic                                              | 0.337 | Stomatitis            |
|  | 0.335 | HIV attachment inhibitor                                  | 0.332 | Urinary retention     |
|  | 0.334 | 5 Hydroxytryptamine release inhibitor                     | 0.332 | Galactorrhea          |
|  | 0.333 | CYP2D6 substrate                                          | 0.325 | Piloerection          |
|  | 0.333 | CYP2C9 substrate                                          | 0.325 | Palpitation           |
|  | 0.329 | Phospholipase A2 inhibitor                                | 0.324 | Sleep disturbance     |
|  | 0.328 | 4-Nitrophenol 2-monooxygenase inhibitor                   | 0.324 | Nail discoloration    |
|  | 0.325 | Antinephritic                                             | 0.320 | Thrombophlebitis      |
|  | 0.325 | Caspase 3 stimulant                                       | 0.318 | Coma                  |
|  | 0.324 | 5 Hydroxytryptamine 7 agonist                             | 0.317 | Optic neuritis        |
|  | 0.324 | Sigma receptor agonist                                    | 0.316 | Porphyria             |
|  | 0.321 | Monoamine uptake inhibitor                                | 0.311 | Sedative              |
|  | 0.321 | Mucomembranous protector                                  | 0.311 | Keratopathy           |
|  | 0.319 | Mucositis treatment                                       | 0.309 | Psychoses             |
|  | 0.318 | Steroid N-acetylglucosaminyltransferase inhibitor         | 0.308 | Parkinsonism          |
|  | 0.317 | Cytoprotectant                                            | 0.307 | Withdrawal            |
|  | 0.315 | Lactase inhibitor                                         | 0.305 | Ataxia                |
|  | 0.314 | HERG 1 channel blocker                                    | 0.302 | Fasciculation         |
|  | 0.314 | Nicotine dehydrogenase inhibitor                          | 0.302 | Sialorrhea            |
|  | 0.313 | Phospholipase inhibitor                                   | 0.300 | Apnea                 |
|  | 0.313 | CYP2D substrate                                           | 0.300 | Toxic. vascular       |
|  | 0.312 | Octopamine antagonist                                     |       |                       |

|                 |       |                                                      |       |                             |
|-----------------|-------|------------------------------------------------------|-------|-----------------------------|
|                 | 0.311 | Prion diseases treatment                             |       |                             |
|                 | 0.310 | CYP4A substrate                                      |       |                             |
|                 | 0.310 | Nitrate reductase (cytochrome) inhibitor             |       |                             |
|                 | 0.309 | CYP4F2 substrate                                     |       |                             |
|                 | 0.307 | 5 Hydroxytryptamine uptake stimulant                 |       |                             |
|                 | 0.306 | CYP2B10 substrate                                    |       |                             |
|                 | 0.306 | Antiinflammatory. intestinal                         |       |                             |
|                 | 0.303 | Nicotinic alpha2beta2 receptor antagonist            |       |                             |
|                 | 0.303 | Pseudolysin inhibitor                                |       |                             |
|                 | 0.300 | Antipruritic. allergic                               |       |                             |
| <b>44397500</b> | 0.498 | HERG 1 channel blocker                               | 0.499 | Chorea                      |
|                 | 0.491 | Rhinitis treatment                                   | 0.485 | Torticollis                 |
|                 | 0.481 | Antiasthmatic                                        | 0.483 | Sneezing                    |
|                 | 0.468 | 5 Hydroxytryptamine uptake stimulant                 | 0.482 | Xerostomia                  |
|                 | 0.462 | Antieczematic                                        | 0.480 | Muscle weakness             |
|                 | 0.449 | Carboxypeptidase Taq inhibitor                       | 0.479 | Dizziness                   |
|                 | 0.437 | CYP2C8 inhibitor                                     | 0.478 | Sweating                    |
|                 | 0.430 | Nicotinic alpha6beta3beta4alpha5 receptor antagonist | 0.472 | Urinary retention           |
|                 | 0.429 | Endopeptidase So inhibitor                           | 0.472 | Hypotonia                   |
|                 | 0.426 | Gastrin inhibitor                                    | 0.469 | Bradycardic                 |
|                 | 0.423 | Sulfur reductase inhibitor                           | 0.463 | Tremor                      |
|                 | 0.420 | Preneoplastic conditions treatment                   | 0.462 | Extrapyramidal effect       |
|                 | 0.419 | 27-Hydroxycholesterol 7alpha-monooxygenase inhibitor | 0.462 | Conjunctivitis              |
|                 | 0.416 | CYP2C19 inhibitor                                    | 0.458 | Paralysis                   |
|                 | 0.405 | General pump inhibitor                               | 0.456 | Ataxia                      |
|                 | 0.403 | Antiviral (Picornavirus)                             | 0.450 | Acidosis                    |
|                 | 0.403 | Membrane permeability inhibitor                      | 0.447 | Torsades de pointes         |
|                 | 0.402 | Mediator release inhibitor                           | 0.442 | Sensory disturbance         |
|                 | 0.401 | Platelet aggregation stimulant                       | 0.435 | Allergic contact dermatitis |
|                 | 0.400 | Hydroxylamine oxidase inhibitor                      | 0.432 | Edema                       |
|                 | 0.397 | Prostate disorders treatment                         | 0.432 | Hepatitis                   |
|                 | 0.397 | Antidyskinetic                                       | 0.425 | Laryngospasm                |
|                 | 0.396 | Antieczematic atopic                                 | 0.424 | Sleep disturbance           |
|                 | 0.394 | GST A substrate                                      | 0.421 | Photoallergy dermatitis     |
|                 | 0.385 | Ubiquinol-cytochrome-c reductase inhibitor           | 0.413 | Euphoria                    |
|                 | 0.377 | CYP2C18 substrate                                    | 0.413 | Toxic. respiration          |
|                 | 0.377 | Histidine kinase inhibitor                           | 0.412 | Keratopathy                 |
|                 | 0.373 | Pseudolysin inhibitor                                | 0.408 | Neutrophilic dermatosis     |

|  |       |                                                            |       |                              |
|--|-------|------------------------------------------------------------|-------|------------------------------|
|  |       |                                                            |       | (Sweet's syndrome)           |
|  | 0.373 | Calcium channel (voltage-sensitive) activator              | 0.395 | Retroperitoneal fibrosis     |
|  | 0.372 | Amine dehydrogenase inhibitor                              | 0.391 | Gastrointestinal hemorrhage  |
|  | 0.371 | Leukotriene-C4 synthase inhibitor                          | 0.390 | Hypotension                  |
|  | 0.369 | Dermatologic                                               | 0.389 | Nail discoloration           |
|  | 0.368 | 5-O-(4-coumaroyl)-D-quinic 3'-monooxygenase inhibitor      | 0.383 | Cyanosis                     |
|  | 0.367 | HIV attachment inhibitor                                   | 0.383 | Occult bleeding              |
|  | 0.364 | Antiviral (Rhinovirus)                                     | 0.381 | Cholestasis                  |
|  | 0.356 | Fructose 5-dehydrogenase inhibitor                         | 0.379 | Myocarditis                  |
|  | 0.355 | Benzoin aldolase inhibitor                                 | 0.375 | Necrosis                     |
|  | 0.353 | Monoamine uptake inhibitor                                 | 0.372 | Tachycardiac                 |
|  | 0.352 | CYP4A11 substrate                                          | 0.371 | Gastrointestinal disturbance |
|  | 0.351 | Fibrinolytic                                               | 0.365 | Yawning                      |
|  | 0.350 | Nicotinic alpha2beta2 receptor antagonist                  | 0.363 | Thrombophlebitis             |
|  | 0.348 | Electron-transferring-flavoprotein dehydrogenase inhibitor | 0.359 | Consciousness alteration     |
|  | 0.347 | Antitussive. narcotic                                      | 0.358 | Sialorrhea                   |
|  | 0.346 | Nitrate reductase (cytochrome) inhibitor                   | 0.356 | Drowsiness                   |
|  | 0.346 | 2-Hydroxyquinoline 8-monooxygenase inhibitor               | 0.355 | Hypomagnesemia               |
|  | 0.344 | Glyceryl-ether monooxygenase inhibitor                     | 0.355 | Emetic                       |
|  | 0.342 | Mucositis treatment                                        | 0.353 | Anorexiant                   |
|  | 0.337 | IgA-specific serine endopeptidase inhibitor                | 0.349 | Respiratory impairment       |
|  | 0.337 | Gluconate 5-dehydrogenase inhibitor                        | 0.345 | Visual acuity impairment     |
|  | 0.332 | Phthalate 4.5-dioxygenase inhibitor                        | 0.340 | QT interval prolongation     |
|  | 0.332 | Polyporopepsin inhibitor                                   | 0.336 | Dysphoria                    |
|  | 0.329 | RNA-directed RNA polymerase inhibitor                      | 0.335 | Interstitial nephritis       |
|  | 0.329 | Diabetic neuropathy treatment                              | 0.335 | Coma                         |
|  | 0.328 | Macrophage colony stimulating factor agonist               | 0.335 | Ocular toxicity              |
|  | 0.327 | 5 Hydroxytryptamine 2B agonist                             | 0.335 | Psychoses                    |
|  | 0.323 | Intermittent claudication treatment                        | 0.333 | Headache                     |
|  | 0.322 | Antiprotozoal (Leishmania)                                 | 0.332 | Dyskinesia                   |
|  | 0.321 | Antinociceptive                                            | 0.331 | Sedative                     |
|  | 0.318 | Botulin neurotoxin A light chain inhibitor                 | 0.330 | Dependence                   |
|  | 0.318 | Cl--transporting ATPase inhibitor                          | 0.330 | Hyperglycemic                |
|  | 0.317 | Complement factor D inhibitor                              | 0.325 | Pure red cell aplasia        |
|  | 0.315 | CYP3A4 substrate                                           | 0.325 | Asthma                       |
|  | 0.312 | H+-exporting ATPase inhibitor                              | 0.320 | Endocrine disruptor          |
|  | 0.312 | CYP2A8 substrate                                           | 0.320 | Nephritis                    |
|  | 0.312 | Mucomembranous protector                                   | 0.319 | Dermatitis                   |

|                 |       |                                                      |       |                             |
|-----------------|-------|------------------------------------------------------|-------|-----------------------------|
|                 | 0.311 | CF transmembrane conductance regulator agonist       | 0.318 | Stomatitis                  |
|                 | 0.307 | Thioredoxin inhibitor                                | 0.315 | Pain                        |
|                 | 0.306 | Sugar-phosphatase inhibitor                          | 0.312 | Adrenal cortex hypoplasia   |
|                 | 0.306 | Fusarinine-C ornithinesterase inhibitor              | 0.307 | Depression                  |
|                 | 0.305 | Antipruritic                                         | 0.304 | Parkinsonism                |
|                 | 0.302 | CYP3A substrate                                      | 0.302 | Behavioral disturbance      |
|                 | 0.301 | Coccolysin inhibitor                                 | 0.300 | Spermicide                  |
|                 | 0.300 | Lysyl oxidase inhibitor                              |       |                             |
| <b>44397540</b> | 0.489 | Antiasthmatic                                        | 0.486 | Excitability                |
|                 | 0.489 | Aspulvinone dimethylallyltransferase inhibitor       | 0.482 | Torsades de pointes         |
|                 | 0.473 | Fibrinolytic                                         | 0.472 | Extrapyramidal effect       |
|                 | 0.472 | Platelet adhesion inhibitor                          | 0.445 | Conjunctivitis              |
|                 | 0.471 | General pump inhibitor                               | 0.440 | Gastrointestinal hemorrhage |
|                 | 0.452 | Gastrin inhibitor                                    | 0.438 | Pseudoporphyria             |
|                 | 0.447 | Membrane permeability inhibitor                      | 0.432 | Weakness                    |
|                 | 0.432 | Rhinitis treatment                                   | 0.427 | Hypercholesterolemic        |
|                 | 0.424 | Antinociceptive                                      | 0.426 | Tremor                      |
|                 | 0.421 | CYP2C18 substrate                                    | 0.426 | Weight gain                 |
|                 | 0.407 | Antidyskinetic                                       | 0.419 | Hypotension                 |
|                 | 0.406 | Acrocyllindropepsin inhibitor                        | 0.417 | Sweating                    |
|                 | 0.406 | Saccharopepsin inhibitor                             | 0.391 | Acidosis                    |
|                 | 0.406 | Chymosin inhibitor                                   | 0.389 | Dizziness                   |
|                 | 0.401 | Amine dehydrogenase inhibitor                        | 0.384 | Photoallergy dermatitis     |
|                 | 0.401 | Gonadotropin antagonist                              | 0.382 | Akathisia                   |
|                 | 0.397 | Calcium channel (voltage-sensitive) activator        | 0.381 | Xerostomia                  |
|                 | 0.396 | Platelet aggregation stimulant                       | 0.379 | Muscle weakness             |
|                 | 0.396 | CDP-glycerol glycerophosphotransferase inhibitor     | 0.376 | Sneezing                    |
|                 | 0.394 | CYP2H substrate                                      | 0.375 | Bradycardic                 |
|                 | 0.391 | Prostate disorders treatment                         | 0.375 | Myoclonus                   |
|                 | 0.391 | Sulfur reductase inhibitor                           | 0.366 | Ocular toxicity             |
|                 | 0.387 | Nicotinic alpha6beta3beta4alpha5 receptor antagonist | 0.362 | Depression                  |
|                 | 0.380 | Plastoquinol-plastocyanin reductase inhibitor        | 0.362 | Torticollis                 |
|                 | 0.379 | 5 Hydroxytryptamine 2B agonist                       | 0.353 | Laryngospasm                |
|                 | 0.378 | Benzoin aldolase inhibitor                           | 0.352 | Cyanosis                    |
|                 | 0.377 | Dermatologic                                         | 0.352 | Nephritis                   |
|                 | 0.377 | Acetylcholine neuromuscular blocking agent           | 0.351 | Edema                       |
|                 | 0.375 | Polyporopepsin inhibitor                             | 0.350 | Cholestasis                 |

|  |       |                                                        |       |                              |
|--|-------|--------------------------------------------------------|-------|------------------------------|
|  | 0.369 | Carboxypeptidase Taq inhibitor                         | 0.350 | Sensory disturbance          |
|  | 0.364 | CYP2D6 substrate                                       | 0.347 | Euphoria                     |
|  | 0.360 | Antieczematic atopic                                   | 0.344 | Dysphoria                    |
|  | 0.359 | Antiviral (Rhinovirus)                                 | 0.342 | Allergic contact dermatitis  |
|  | 0.358 | Glycerol-ether monooxygenase inhibitor                 | 0.341 | Dysarthria                   |
|  | 0.357 | Intermittent claudication treatment                    | 0.339 | Palpitation                  |
|  | 0.355 | HIV attachment inhibitor                               | 0.339 | Retroperitoneal fibrosis     |
|  | 0.354 | Antiviral (Picornavirus)                               | 0.337 | Ulcer. gastric               |
|  | 0.351 | Fusarinine-C ornithinesterase inhibitor                | 0.335 | Visual acuity impairment     |
|  | 0.350 | Male reproductive dysfunction treatment                | 0.332 | Interstitial nephritis       |
|  | 0.350 | Caspase 3 stimulant                                    | 0.330 | Fibrillation. atrial         |
|  | 0.347 | Antipruritic                                           | 0.329 | Gastrointestinal disturbance |
|  | 0.347 | Octopamine antagonist                                  | 0.327 | Toxic. respiration           |
|  | 0.346 | Leukotriene-C4 synthase inhibitor                      | 0.326 | Tachycardiac                 |
|  | 0.346 | Ubiquinol-cytochrome-c reductase inhibitor             | 0.325 | Reproductive dysfunction     |
|  | 0.344 | Heat shock protein 27 antagonist                       | 0.324 | Nail discoloration           |
|  | 0.343 | Ovulation inhibitor                                    | 0.323 | Cardiodepressant             |
|  | 0.342 | Fructose 5-dehydrogenase inhibitor                     | 0.321 | Behavioral disturbance       |
|  | 0.341 | CYP2D substrate                                        | 0.321 | Dystonia                     |
|  | 0.340 | 5 Hydroxytryptamine antagonist                         | 0.320 | Fibrosis. interstitial       |
|  | 0.340 | CYP2J2 substrate                                       | 0.320 | Paralysis                    |
|  | 0.337 | Monoamine uptake inhibitor                             | 0.317 | Hypotonia                    |
|  | 0.334 | Antitussive. narcotic                                  | 0.315 | Ulcer. peptic                |
|  | 0.334 | Membrane integrity antagonist                          | 0.309 | Sleep disturbance            |
|  | 0.334 | Histamine release stimulant                            | 0.308 | Stomatitis                   |
|  | 0.331 | 1-Acylglycerol-3-phosphate O-acyltransferase inhibitor | 0.307 | Dependence                   |
|  | 0.327 | Cytoprotectant                                         | 0.307 | Sedative                     |
|  | 0.327 | CYP2C8 inhibitor                                       | 0.305 | Fasciculation                |
|  | 0.324 | ATP-binding cassette A1 stimulant                      | 0.303 | Optic neuropathy             |
|  | 0.323 | 5 Hydroxytryptamine release inhibitor                  | 0.301 | Piloerection                 |
|  | 0.321 | 2-Hydroxyquinoline 8-monooxygenase inhibitor           |       |                              |
|  | 0.316 | 27-Hydroxycholesterol 7alpha-monooxygenase inhibitor   |       |                              |
|  | 0.315 | Prion diseases treatment                               |       |                              |
|  | 0.312 | Antiinflammatory. intestinal                           |       |                              |
|  | 0.311 | 5 Hydroxytryptamine 7 agonist                          |       |                              |
|  | 0.310 | Phospholipase A2 inhibitor                             |       |                              |
|  | 0.310 | Antiprotozoal (Leishmania)                             |       |                              |
|  | 0.308 | Endopeptidase So inhibitor                             |       |                              |

|                 |       |                                            |       |                                    |
|-----------------|-------|--------------------------------------------|-------|------------------------------------|
|                 | 0.307 | 5 Hydroxytryptamine uptake stimulant       |       |                                    |
|                 | 0.305 | Antiinflammatory                           |       |                                    |
|                 | 0.303 | Caspase 8 stimulant                        |       |                                    |
|                 | 0.303 | Nicotinic alpha2beta2 receptor antagonist  |       |                                    |
|                 | 0.303 | Pseudolysin inhibitor                      |       |                                    |
|                 | 0.302 | CYP2C19 inhibitor                          |       |                                    |
|                 | 0.302 | 4-Nitrophenol 2-monooxygenase inhibitor    |       |                                    |
|                 | 0.300 | Vanilloid 1 agonist                        |       |                                    |
| <b>53494930</b> | 0.497 | 5 Hydroxytryptamine antagonist             | 0.479 | Yawning                            |
|                 | 0.462 | Platelet adhesion inhibitor                | 0.463 | Twitching                          |
|                 | 0.455 | Analgesic                                  | 0.416 | Sneezing                           |
|                 | 0.443 | Rhinitis treatment                         | 0.400 | Torsades de pointes                |
|                 | 0.431 | Acetylcholine neuromuscular blocking agent | 0.386 | Hyperglycemic                      |
|                 | 0.428 | Antineurotic                               | 0.380 | Parkinsonism                       |
|                 | 0.425 | Antiallergic                               | 0.374 | Palpitation                        |
|                 | 0.425 | Octopamine antagonist                      | 0.351 | Piloerection                       |
|                 | 0.420 | Ovulation inhibitor                        | 0.348 | Postural (orthostatic) hypotension |
|                 | 0.404 | Neurotransmitter antagonist                | 0.341 | Torticollis                        |
|                 | 0.389 | Antinociceptive                            | 0.326 | Dystonia                           |
|                 | 0.374 | CYP2D2 inhibitor                           | 0.325 | Galactorrhea                       |
|                 | 0.372 | Antihistaminic                             | 0.319 | Tremor                             |
|                 | 0.369 | Histamine antagonist                       | 0.317 | Hypothermic                        |
|                 | 0.366 | Systemic lupus erythematosus treatment     | 0.316 | Akathisia                          |
|                 | 0.364 | Male reproductive dysfunction treatment    | 0.315 | Psychoses                          |
|                 | 0.358 | Antitussive. narcotic                      | 0.313 | Shivering                          |
|                 | 0.354 | Cognition disorders treatment              | 0.312 | Euphoria                           |
|                 | 0.349 | Neurotransmitter uptake inhibitor          | 0.310 | Choreoathetosis                    |
|                 | 0.339 | Vascular (periferal) disease treatment     | 0.310 | Xerostomia                         |
|                 | 0.337 | Nicotinic alpha4beta2 receptor antagonist  | 0.309 | Excitability                       |
|                 | 0.337 | Histamine release stimulant                | 0.301 | Paralysis                          |
|                 | 0.330 | HIV attachment inhibitor                   |       |                                    |
|                 | 0.327 | HERG 1 channel blocker                     |       |                                    |
|                 | 0.323 | Benzoin aldolase inhibitor                 |       |                                    |
|                 | 0.323 | Alzheimer's disease treatment              |       |                                    |
|                 | 0.321 | MAP kinase stimulant                       |       |                                    |
|                 | 0.318 | Heat shock protein 27 antagonist           |       |                                    |
|                 | 0.316 | 5 Hydroxytryptamine 2B agonist             |       |                                    |
|                 | 0.310 | Antiasthmatic                              |       |                                    |
|                 | 0.308 | 4-Nitrophenol 2-monooxygenase inhibitor    |       |                                    |

|                 |       |                                                            |       |                                            |
|-----------------|-------|------------------------------------------------------------|-------|--------------------------------------------|
|                 | 0.305 | Sleep disorders treatment                                  |       |                                            |
|                 | 0.304 | Antiischemic. cerebral                                     |       |                                            |
| <b>11616723</b> | 0.499 | CYP2C19 inhibitor                                          | 0.499 | Nail discoloration                         |
|                 | 0.497 | CYP2J2 substrate                                           | 0.485 | Tachycardiac                               |
|                 | 0.488 | HERG 1 channel blocker                                     | 0.485 | Nephritis                                  |
|                 | 0.481 | Platelet aggregation stimulant                             | 0.483 | Necrosis                                   |
|                 | 0.465 | Rhinitis treatment                                         | 0.482 | Tremor                                     |
|                 | 0.462 | Antiasthmatic                                              | 0.480 | Interstitial nephritis                     |
|                 | 0.453 | Antinociceptive                                            | 0.479 | Pseudoporphyria                            |
|                 | 0.452 | All-trans-retinyl-palmitate hydrolase inhibitor            | 0.478 | Hepatitis                                  |
|                 | 0.450 | Nicotinic alpha6beta3beta4alpha5 receptor antagonist       | 0.475 | Torsades de pointes                        |
|                 | 0.441 | Polyporopepsin inhibitor                                   | 0.474 | Toxic. respiration                         |
|                 | 0.437 | General pump inhibitor                                     | 0.472 | Stomatitis                                 |
|                 | 0.434 | Chlordecone reductase inhibitor                            | 0.472 | Fibrillation. atrial                       |
|                 | 0.434 | Gluconate 2-dehydrogenase (acceptor) inhibitor             | 0.469 | Hypothermic                                |
|                 | 0.421 | Fibrinolytic                                               | 0.467 | Edema                                      |
|                 | 0.418 | Prostate disorders treatment                               | 0.463 | Reproductive dysfunction                   |
|                 | 0.418 | Pseudolysin inhibitor                                      | 0.463 | Dizziness                                  |
|                 | 0.417 | Gluconate 5-dehydrogenase inhibitor                        | 0.462 | Choreoathetosis                            |
|                 | 0.415 | Dermatologic                                               | 0.462 | Cholestasis                                |
|                 | 0.415 | Platelet adhesion inhibitor                                | 0.462 | Dysarthria                                 |
|                 | 0.409 | Glycerol-ether monooxygenase inhibitor                     | 0.458 | Sensory disturbance                        |
|                 | 0.408 | Glycosylphosphatidylinositol phospholipase D inhibitor     | 0.457 | Delirium                                   |
|                 | 0.407 | Electron-transferring-flavoprotein dehydrogenase inhibitor | 0.456 | Psychoses                                  |
|                 | 0.407 | Ubiquinol-cytochrome-c reductase inhibitor                 | 0.454 | Multiple organ failure                     |
|                 | 0.400 | Histidine kinase inhibitor                                 | 0.450 | Asthma                                     |
|                 | 0.400 | Trimethylamine-oxide aldolase inhibitor                    | 0.447 | Keratopathy                                |
|                 | 0.398 | 27-Hydroxycholesterol 7alpha-monooxygenase inhibitor       | 0.446 | Allergic contact dermatitis                |
|                 | 0.395 | Antidyskinetic                                             | 0.442 | Gastrointestinal hemorrhage                |
|                 | 0.393 | CYP2C8 inhibitor                                           | 0.442 | Retroperitoneal fibrosis                   |
|                 | 0.390 | Glutamyl endopeptidase II inhibitor                        | 0.435 | Akathisia                                  |
|                 | 0.384 | Antiviral (Picornavirus)                                   | 0.434 | Sleep disturbance                          |
|                 | 0.383 | 5 Hydroxytryptamine release stimulant                      | 0.433 | Photoallergy dermatitis                    |
|                 | 0.382 | Antipruritic                                               | 0.432 | Neutrophilic dermatosis (Sweet's syndrome) |
|                 | 0.380 | Sulfur reductase inhibitor                                 | 0.432 | Myoclonus                                  |

|  |       |                                                           |       |                              |
|--|-------|-----------------------------------------------------------|-------|------------------------------|
|  | 0.379 | Macrophage colony stimulating factor agonist              | 0.429 | Respiratory impairment       |
|  | 0.376 | Antieczematic atopic                                      | 0.429 | Thrombophlebitis             |
|  | 0.376 | Nicotinic alpha2beta2 receptor antagonist                 | 0.427 | Cyanosis                     |
|  | 0.375 | Benzoin aldolase inhibitor                                | 0.426 | Inflammation                 |
|  | 0.374 | Alkylacetylgllycerophosphatase inhibitor                  | 0.425 | Ataxia                       |
|  | 0.372 | Amine dehydrogenase inhibitor                             | 0.425 | Ocular toxicity              |
|  | 0.372 | Membrane integrity antagonist                             | 0.424 | Hypotension                  |
|  | 0.372 | Sugar-phosphatase inhibitor                               | 0.423 | Respiratory failure          |
|  | 0.371 | Histamine release inhibitor                               | 0.421 | Hyperthermic                 |
|  | 0.371 | Thioredoxin inhibitor                                     | 0.418 | Gastrointestinal disturbance |
|  | 0.368 | Plastoquinol-plastocyanin reductase inhibitor             | 0.417 | Emetic                       |
|  | 0.365 | Preneoplastic conditions treatment                        | 0.414 | Coma                         |
|  | 0.360 | Fusarinine-C ornithinesterase inhibitor                   | 0.413 | Fibrosis. interstitial       |
|  | 0.359 | Membrane permeability inhibitor                           | 0.413 | Extrapyramidal effect        |
|  | 0.357 | Antitussive. narcotic                                     | 0.412 | Torticollis                  |
|  | 0.355 | Ecdysone 20-monooxygenase inhibitor                       | 0.412 | Withdrawal                   |
|  | 0.354 | Hydroxylamine oxidase inhibitor                           | 0.410 | Dyskinesia                   |
|  | 0.354 | Insulin promoter                                          | 0.408 | Dystonia                     |
|  | 0.352 | CYP2C9 substrate                                          | 0.401 | Hyperglycemic                |
|  | 0.351 | Phosphatidylcholine-retinol O-acyltransferase inhibitor   | 0.398 | Sedative                     |
|  | 0.350 | Antiviral (Rhinovirus)                                    | 0.395 | Dysphoria                    |
|  | 0.348 | Nitrate reductase (cytochrome) inhibitor                  | 0.393 | Depression                   |
|  | 0.345 | Fatty-acyl-CoA synthase inhibitor                         | 0.391 | Drowsiness                   |
|  | 0.345 | Chymosin inhibitor                                        | 0.390 | Behavioral disturbance       |
|  | 0.345 | Acrocyllindropepsin inhibitor                             | 0.390 | Sialorrhea                   |
|  | 0.345 | Saccharopepsin inhibitor                                  | 0.389 | Apnea                        |
|  | 0.344 | Oxidizing agent                                           | 0.387 | Fasciculation                |
|  | 0.344 | CYP2C18 substrate                                         | 0.383 | Laryngospasm                 |
|  | 0.344 | 5 Hydroxytryptamine release inhibitor                     | 0.383 | Anorexiant                   |
|  | 0.344 | Calcium channel (voltage-sensitive) activator             | 0.383 | Visual acuity impairment     |
|  | 0.343 | Phospholipase A2 inhibitor                                | 0.381 | Yawning                      |
|  | 0.343 | CYP2F1 substrate                                          | 0.380 | Chorea                       |
|  | 0.342 | Phenol O-methyltransferase inhibitor                      | 0.379 | Dependence                   |
|  | 0.341 | HIV attachment inhibitor                                  | 0.379 | Bronchoconstrictor           |
|  | 0.340 | Phospholipase inhibitor                                   | 0.378 | Cleft palate                 |
|  | 0.340 | 5 Hydroxytryptamine uptake stimulant                      | 0.378 | Urinary retention            |
|  | 0.336 | Protein-S-isoprenylcysteine O-methyltransferase inhibitor | 0.375 | Hypercholesterolemic         |
|  | 0.334 | Leukotriene-C4 synthase inhibitor                         | 0.373 | Nausea                       |

|  |       |                                                     |       |                            |
|--|-------|-----------------------------------------------------|-------|----------------------------|
|  | 0.333 | Antiviral (Adenovirus)                              | 0.372 | Dermatitis                 |
|  | 0.332 | Prostaglandin-A1 DELTA-isomerase inhibitor          | 0.372 | Headache                   |
|  | 0.329 | Mucomembranous protector                            | 0.371 | Acidosis. lactic           |
|  | 0.328 | Urethanase inhibitor                                | 0.368 | Hypotonia                  |
|  | 0.323 | Glutathione thiolesterase inhibitor                 | 0.365 | Acneiform eruption         |
|  | 0.323 | Lysine 2.3-aminomutase inhibitor                    | 0.365 | Leukopenia                 |
|  | 0.323 | Ovulation inhibitor                                 | 0.363 | Thrombocytopenia           |
|  | 0.322 | Leukotriene-B4 20-monooxygenase inhibitor           | 0.361 | Pulmonary edema            |
|  | 0.322 | Glucan endo-1.3-beta-D-glucosidase inhibitor        | 0.359 | Hypomagnesemia             |
|  | 0.320 | Monoamine uptake inhibitor                          | 0.359 | Splenomegaly               |
|  | 0.320 | Gonadotropin antagonist                             | 0.358 | Hypocalcaemic              |
|  | 0.320 | Oxygen scavenger                                    | 0.357 | Vasopressor                |
|  | 0.319 | CYP4A11 substrate                                   | 0.356 | Pure red cell aplasia      |
|  | 0.319 | Aspulvinone dimethylallyltransferase inhibitor      | 0.355 | Mydriatic                  |
|  | 0.318 | Alkane 1-monooxygenase inhibitor                    | 0.355 | Dyspnea                    |
|  | 0.318 | CF transmembrane conductance regulator agonist      | 0.354 | Demyelination              |
|  | 0.317 | Omptin inhibitor                                    | 0.353 | Neurotoxic                 |
|  | 0.315 | Octopamine antagonist                               | 0.349 | Ulcer. gastric             |
|  | 0.308 | Caspase 8 stimulant                                 | 0.349 | Skin irritation. corrosive |
|  | 0.308 | Antiinflammatory                                    | 0.348 | Cardiodepressant           |
|  | 0.308 | Testosterone 17beta-dehydrogenase (NADP+) inhibitor | 0.347 | Porphyria                  |
|  | 0.307 | CYP2C29 substrate                                   | 0.345 | Hypomania                  |
|  | 0.306 | Tryptophan 2.3-dioxygenase inhibitor                | 0.345 | Irritation                 |
|  | 0.306 | NADPH-cytochrome-c2 reductase inhibitor             | 0.343 | Bullous pemphigoid         |
|  | 0.305 | Ribulose-phosphate 3-epimerase inhibitor            | 0.342 | Hypnotic                   |
|  | 0.304 | FMO3 substrate                                      | 0.340 | Pneumotoxic                |
|  | 0.303 | Acetylesterase inhibitor                            | 0.339 | Hypothermic                |
|  | 0.303 | Insulysin inhibitor                                 | 0.336 | Fibrillation. atrial       |
|  | 0.302 | CYP2C9 inducer                                      | 0.335 | Delirium                   |
|  | 0.302 | Erythropoiesis stimulant                            | 0.335 | Torticollis                |
|  | 0.301 | Chloride channel blocker                            | 0.335 | Chorea                     |
|  | 0.301 | Intermittent claudication treatment                 | 0.335 | Reproductive dysfunction   |
|  | 0.300 | Venombin AB inhibitor                               | 0.333 | Weakness                   |
|  |       |                                                     | 0.332 | Sneezing                   |
|  |       |                                                     | 0.331 | Muscle weakness            |
|  |       |                                                     | 0.330 | Torsades de pointes        |
|  |       |                                                     | 0.330 | Sweating                   |
|  |       |                                                     | 0.329 | Tremor                     |

|                 |       |                                               |       |                             |
|-----------------|-------|-----------------------------------------------|-------|-----------------------------|
|                 |       |                                               | 0.328 | Urinary retention           |
|                 |       |                                               | 0.328 | Dizziness                   |
|                 |       |                                               | 0.325 | Xerostomia                  |
|                 |       |                                               | 0.325 | Hypotonia                   |
|                 |       |                                               | 0.322 | Bradycardic                 |
|                 |       |                                               | 0.321 | Ataxia                      |
|                 |       |                                               | 0.320 | Extrapyramidal effect       |
|                 |       |                                               | 0.320 | Paralysis                   |
|                 |       |                                               | 0.320 | Acidosis                    |
|                 |       |                                               | 0.319 | Allergic contact dermatitis |
|                 |       |                                               | 0.318 | Laryngospasm                |
|                 |       |                                               | 0.317 | Photoallergy dermatitis     |
|                 |       |                                               | 0.315 | Retroperitoneal fibrosis    |
|                 |       |                                               | 0.315 | Edema                       |
|                 |       |                                               | 0.312 | Sensory disturbance         |
|                 |       |                                               | 0.310 | Conjunctivitis              |
|                 |       |                                               | 0.307 | Keratopathy                 |
|                 |       |                                               | 0.304 | Sleep disturbance           |
|                 |       |                                               | 0.304 | Hepatitis                   |
|                 |       |                                               | 0.302 | Euphoria                    |
|                 |       |                                               | 0.302 | Myocarditis                 |
|                 |       |                                               | 0.300 | Cholestasis                 |
| <b>11493740</b> | 0.492 | Antiasthmatic                                 | 0.499 | Euphoria                    |
|                 | 0.486 | Gastrin inhibitor                             | 0.481 | Hypercholesterolemic        |
|                 | 0.463 | Antinociceptive                               | 0.480 | Myoclonus                   |
|                 | 0.448 | Calcium channel (voltage-sensitive) activator | 0.461 | Weakness                    |
|                 | 0.446 | CYP2H substrate                               | 0.456 | Allergic contact dermatitis |
|                 | 0.444 | Polyporopepsin inhibitor                      | 0.449 | Conjunctivitis              |
|                 | 0.442 | CYP2C18 substrate                             | 0.448 | Gastrointestinal hemorrhage |
|                 | 0.435 | Chymosin inhibitor                            | 0.440 | Acidosis                    |
|                 | 0.435 | Acrocylindropepsin inhibitor                  | 0.434 | Fibrillation. atrial        |
|                 | 0.435 | Saccharopepsin inhibitor                      | 0.431 | Hypotension                 |
|                 | 0.431 | Acetylcholine neuromuscular blocking agent    | 0.427 | Dysarthria                  |
|                 | 0.424 | Fibrinolytic                                  | 0.425 | Bradycardic                 |
|                 | 0.413 | Antidyskinetic                                | 0.424 | Photoallergy dermatitis     |
|                 | 0.413 | CYP2C8 inhibitor                              | 0.418 | Akathisia                   |
|                 | 0.409 | Amine dehydrogenase inhibitor                 | 0.408 | Hypotonia                   |
|                 | 0.404 | Prostate disorders treatment                  | 0.406 | Depression                  |
|                 | 0.403 | Rhinitis treatment                            | 0.405 | Muscle weakness             |
|                 | 0.402 | Platelet aggregation stimulant                | 0.402 | Tremor                      |

|  |       |                                                        |       |                          |
|--|-------|--------------------------------------------------------|-------|--------------------------|
|  | 0.397 | Platelet adhesion inhibitor                            | 0.399 | Dizziness                |
|  | 0.392 | Gonadotropin antagonist                                | 0.394 | Edema                    |
|  | 0.391 | Sulfur reductase inhibitor                             | 0.386 | Tachycardiac             |
|  | 0.389 | Plastoquinol-plastocyanin reductase inhibitor          | 0.383 | Laryngospasm             |
|  | 0.388 | Benzoin aldolase inhibitor                             | 0.382 | Paralysis                |
|  | 0.380 | Antiviral (Rhinovirus)                                 | 0.381 | Weight gain              |
|  | 0.377 | 1-Acylglycerol-3-phosphate O-acyltransferase inhibitor | 0.378 | Dysphoria                |
|  | 0.377 | Histamine release stimulant                            | 0.378 | Sneezing                 |
|  | 0.368 | Antieczematic atopic                                   | 0.377 | Hypomania                |
|  | 0.367 | Glycerol-ether monooxygenase inhibitor                 | 0.377 | Fibrosis. interstitial   |
|  | 0.367 | Antiviral (Picornavirus)                               | 0.372 | Xerostomia               |
|  | 0.364 | Antiprotozoal (Leishmania)                             | 0.371 | Reproductive dysfunction |
|  | 0.364 | Antipruritic                                           | 0.366 | Ulcer. gastric           |
|  | 0.361 | Ovulation inhibitor                                    | 0.365 | Yawning                  |
|  | 0.360 | Membrane integrity antagonist                          | 0.364 | Nephritis                |
|  | 0.359 | MAP kinase stimulant                                   | 0.363 | Retroperitoneal fibrosis |
|  | 0.353 | Caspase 8 stimulant                                    | 0.363 | Cyanosis                 |
|  | 0.353 | Ubiquinol-cytochrome-c reductase inhibitor             | 0.361 | Sensory disturbance      |
|  | 0.353 | Nicotinic alpha6beta3beta4alpha5 receptor antagonist   | 0.360 | Necrosis                 |
|  | 0.350 | Fructose 5-dehydrogenase inhibitor                     | 0.359 | Delirium                 |
|  | 0.346 | Leukotriene-C4 synthase inhibitor                      | 0.356 | Cholestasis              |
|  | 0.342 | Steroid N-acetylglucosaminyltransferase inhibitor      | 0.356 | Toxic. respiration       |
|  | 0.340 | Dermatologic                                           | 0.351 | Ulcer. peptic            |
|  | 0.338 | Intermittent claudication treatment                    | 0.351 | Inflammation             |
|  | 0.338 | CYP2D6 substrate                                       | 0.350 | Dystonia                 |
|  | 0.337 | ATP-binding cassette A1 stimulant                      | 0.348 | Palpitation              |
|  | 0.337 | Mucomembranous protector                               | 0.348 | Hepatitis                |
|  | 0.335 | 5 Hydroxytryptamine 7 agonist                          | 0.347 | Galactorrhea             |
|  | 0.333 | Caspase 3 stimulant                                    | 0.344 | Ocular toxicity          |
|  | 0.333 | Carboxypeptidase Taq inhibitor                         | 0.342 | Piloerection             |
|  | 0.331 | Pin1 inhibitor                                         | 0.342 | Visual acuity impairment |
|  | 0.331 | Mucositis treatment                                    | 0.338 | Interstitial nephritis   |
|  | 0.330 | Sigma receptor agonist                                 | 0.333 | Dependence               |
|  | 0.327 | Phospholipase A2 inhibitor                             | 0.332 | Optic neuropathy         |
|  | 0.326 | Antinephritic                                          | 0.331 | Torticollis              |
|  | 0.325 | Monoamine uptake inhibitor                             | 0.328 | Sleep disturbance        |
|  | 0.325 | CYP2C9 substrate                                       | 0.325 | Urinary retention        |

|          |       |                                                           |       |                        |
|----------|-------|-----------------------------------------------------------|-------|------------------------|
|          | 0.324 | 2-Hydroxyquinoline 8-monooxygenase inhibitor              | 0.323 | Fasciculation          |
|          | 0.324 | Fusarinine-C ornithinesterase inhibitor                   | 0.321 | Stomatitis             |
|          | 0.323 | HIV attachment inhibitor                                  | 0.317 | Toxic. vascular        |
|          | 0.323 | CYP2C19 inhibitor                                         | 0.314 | Psychoses              |
|          | 0.323 | 5 Hydroxytryptamine release inhibitor                     | 0.311 | Asthma                 |
|          | 0.322 | Antitussive. narcotic                                     | 0.310 | Coma                   |
|          | 0.322 | Cytoprotectant                                            | 0.307 | Sedative               |
|          | 0.321 | CYP4A substrate                                           | 0.307 | Optic neuritis         |
|          | 0.318 | Phospholipase inhibitor                                   | 0.304 | Psychomotor impairment |
|          | 0.318 | Endopeptidase So inhibitor                                | 0.304 | Sialorrhea             |
|          | 0.317 | Vanilloid 1 agonist                                       | 0.303 | Apnea                  |
|          | 0.317 | Prion diseases treatment                                  | 0.300 | Ataxia                 |
|          | 0.317 | 27-Hydroxycholesterol 7alpha-monooxygenase inhibitor      |       |                        |
|          | 0.316 | 5 Hydroxytryptamine 2B agonist                            |       |                        |
|          | 0.316 | CYP2D substrate                                           |       |                        |
|          | 0.312 | 15-Hydroxyprostaglandin-D dehydrogenase (NADP+) inhibitor |       |                        |
|          | 0.308 | CYP1A2 inhibitor                                          |       |                        |
|          | 0.308 | CYP2J2 substrate                                          |       |                        |
|          | 0.307 | CYP1A inhibitor                                           |       |                        |
|          | 0.307 | Lactase inhibitor                                         |       |                        |
|          | 0.306 | Feruloyl esterase inhibitor                               |       |                        |
|          | 0.306 | Membrane permeability inhibitor                           |       |                        |
|          | 0.304 | 4-Nitrophenol 2-monooxygenase inhibitor                   |       |                        |
|          | 0.302 | HERG 1 channel blocker                                    |       |                        |
|          | 0.300 | Lysyl oxidase inhibitor                                   |       |                        |
| 53394099 | 0.493 | 5 Hydroxytryptamine antagonist                            | 0.499 | Sweating               |
|          | 0.466 | Fibrinolytic                                              | 0.457 | Excitability           |
|          | 0.461 | CYP2H substrate                                           | 0.447 | Twitching              |
|          | 0.460 | General pump inhibitor                                    | 0.413 | Akathisia              |
|          | 0.457 | Antinociceptive                                           | 0.408 | Torsades de pointes    |
|          | 0.450 | Antieczematic                                             | 0.398 | Withdrawal             |
|          | 0.437 | Male reproductive dysfunction treatment                   | 0.387 | Shivering              |
|          | 0.423 | Heat shock protein 27 antagonist                          | 0.387 | Tremor                 |
|          | 0.402 | Pin1 inhibitor                                            | 0.370 | Respiratory impairment |
|          | 0.400 | HIV attachment inhibitor                                  | 0.363 | Yawning                |
|          | 0.399 | MAP kinase stimulant                                      | 0.361 | Urinary retention      |
|          | 0.397 | Mediator release inhibitor                                | 0.360 | Piloerection           |
|          | 0.396 | Prostate disorders treatment                              | 0.342 | Palpitation            |

|  |       |                                                      |       |                             |
|--|-------|------------------------------------------------------|-------|-----------------------------|
|  | 0.388 | Rhinitis treatment                                   | 0.341 | Laryngospasm                |
|  | 0.387 | Neurotransmitter uptake inhibitor                    | 0.337 | Photoallergy dermatitis     |
|  | 0.376 | Cardiovascular analeptic                             | 0.334 | Dizziness                   |
|  | 0.372 | Benzoin aldolase inhibitor                           | 0.333 | Depression                  |
|  | 0.368 | 5 Hydroxytryptamine 2B agonist                       | 0.323 | Gastrointestinal hemorrhage |
|  | 0.367 | Sigma receptor agonist                               | 0.319 | Paralysis                   |
|  | 0.364 | Calcium channel (voltage-sensitive) activator        | 0.316 | Tachycardiac                |
|  | 0.356 | Neuropeptide Y2 antagonist                           | 0.311 | Conjunctivitis              |
|  | 0.349 | Chlordecone reductase inhibitor                      | 0.307 | Myoclonus                   |
|  | 0.348 | Antitussive, narcotic                                | 0.307 | Xerostomia                  |
|  | 0.348 | Aspulvinone dimethylallyltransferase inhibitor       | 0.305 | Sensory disturbance         |
|  | 0.343 | Octopamine antagonist                                | 0.499 | Sweating                    |
|  | 0.339 | Histamine release stimulant                          |       |                             |
|  | 0.334 | Dermatologic                                         |       |                             |
|  | 0.333 | Spasmolytic, urinary                                 |       |                             |
|  | 0.333 | Platelet adhesion inhibitor                          |       |                             |
|  | 0.328 | Caspase 3 stimulant                                  |       |                             |
|  | 0.326 | Nicotinic alpha4beta4 receptor agonist               |       |                             |
|  | 0.320 | Antiviral (Picornavirus)                             |       |                             |
|  | 0.319 | Antieczematic atopic                                 |       |                             |
|  | 0.315 | Antiviral (Rhinovirus)                               |       |                             |
|  | 0.310 | 27-Hydroxycholesterol 7alpha-monooxygenase inhibitor |       |                             |
|  | 0.309 | 4-Nitrophenol 2-monooxygenase inhibitor              |       |                             |
|  | 0.308 | Chloride channel blocker                             |       |                             |
|  | 0.303 | Thromboxane B2 antagonist                            |       |                             |
